# Supplementary material for: Heteronemin and Tetrac Induce Anti-Proliferation by Blocking EGFR-Mediated Signaling in Colorectal Cancer Cells
Source: MDPI journal article supplement (doi:10.3390/md20080482), 2022-07-27
Supplement: s1 [file s1]

Supplementary information for

## **Heteronemin and Tetrac Induce Anti-proliferation by Blocking EGFR-mediated Signaling in Colorectal Cancer Cells**

Sukanya Unson<sup>1</sup>, Tung-Cheng Chang<sup>2</sup>, Yung-Ning Yang<sup>3</sup>, Shwu-Huey Wang<sup>4</sup>, Chi-Hung Huang<sup>5</sup>, Dana R. Crawford<sup>6</sup>, Haw-Ming Huang<sup>7</sup>, Zi-Lin Li<sup>8,9</sup>, Hung-Yun Lin<sup>9,10,11,12,13\*</sup>, Jacqueline Whang-Peng<sup>12\*</sup>, Kuan Wang<sup>3</sup>, Paul J. Davis<sup>13, 14</sup>, Wen-Shan Li<sup>15, 16</sup>

Correspondence to: jqpeng@nhri.edu.tw and linhy@tmu.edu.tw

**This PDF file includes**

Supplementary figures S1 and S2.

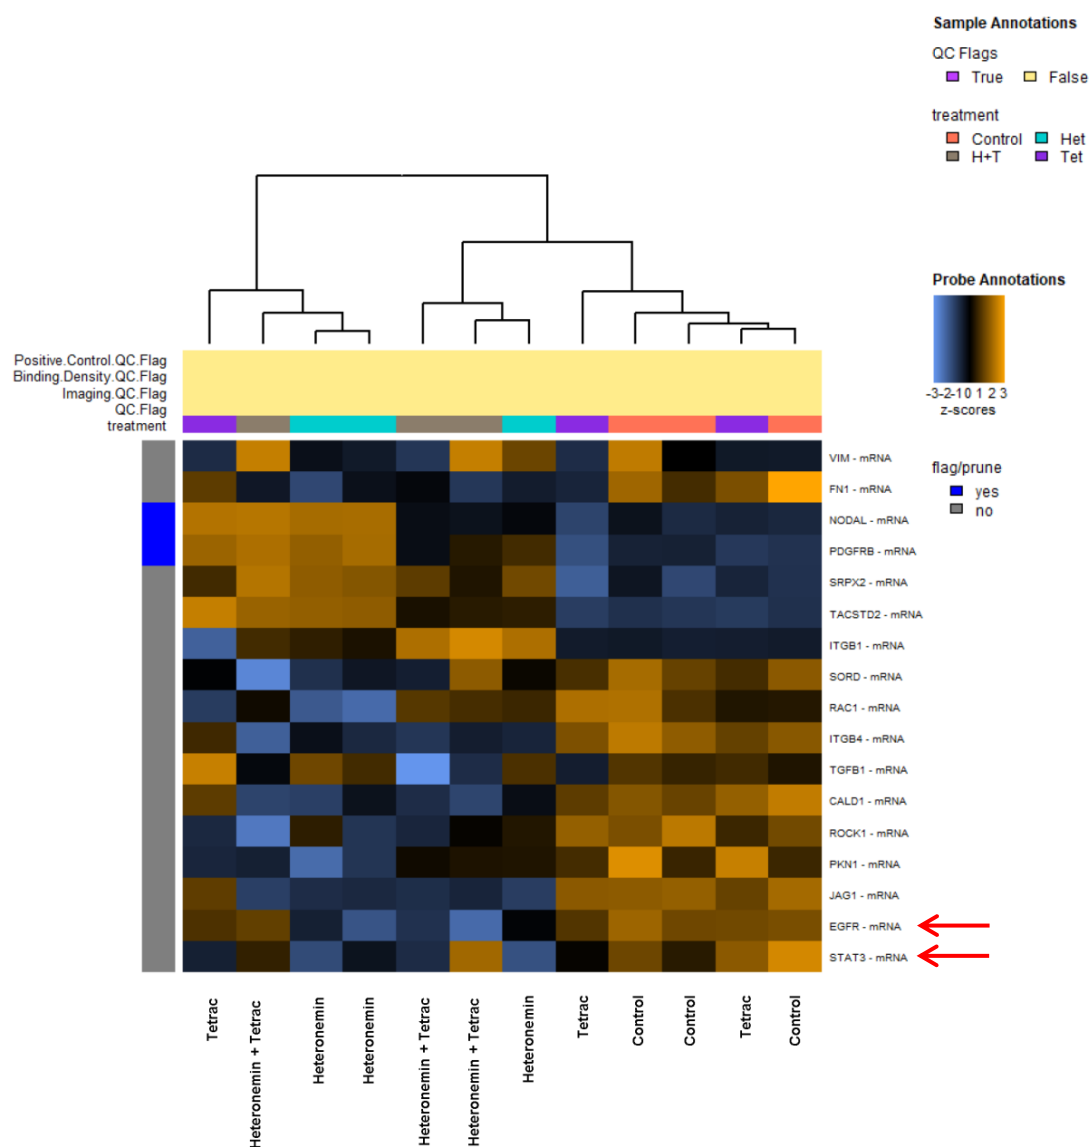

**Figure S1. Heatmap of cell motility genes that showed significant ( $p < 0.05$ ) upregulation or downregulation.** HCT-116 cells were treated with heteronemin, tetrac, and their combination for 24 h. mRNA expression levels were identified by a NanoString® analysis using the nCounter PanCancer Progression Panel.

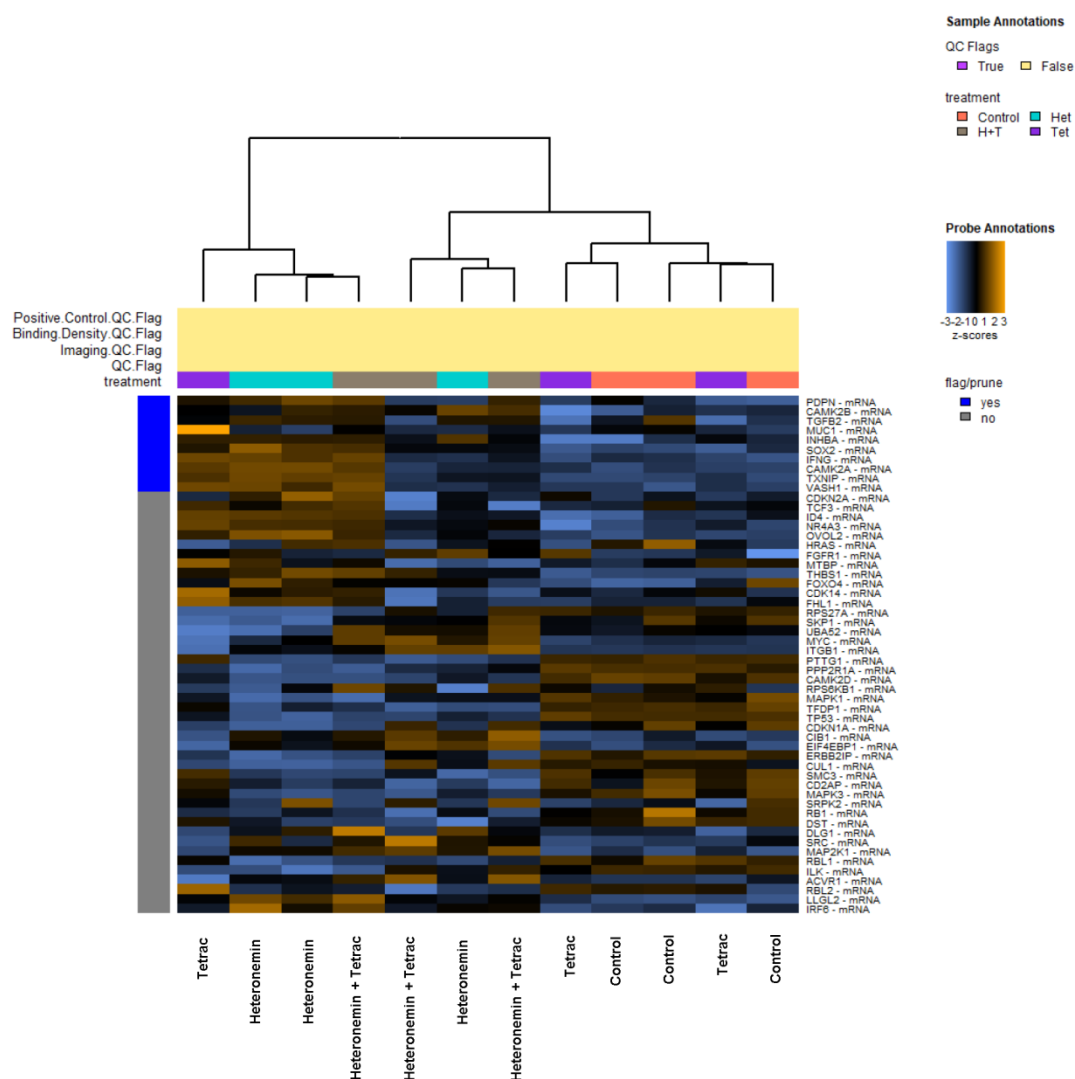

**Figure S2. Heatmap of gene expressions involved in the cell cycle showed significant ( $p < 0.05$ ) upregulation or downregulation.** HCT-116 cells were treated with heteronemin, tetrac, and their combination for 24 h. mRNA expressions were identified by NanoString® analysis using the nCounter PanCancer Progression Panel.
